# Supplementary material for: Flexible vs. rigid covalent organic frameworks: catalytic performance in the Knoevenagel reaction
Source: Royal Society of Chemistry journal article supplement (doi:10.1039/d4ta06623e), 2024-01-01
Supplement: d4ta06623e1.pdf [file d4ta06623e1.pdf]

## Supporting information

### Flexible vs. Rigid Covalent Organic Frameworks: Catalytic Performance in the Knoevenagel Reaction

Zerong Jing,<sup>a</sup> Xiaokun Shi,<sup>a</sup> Xiaoqian Tao,<sup>a</sup> Benhai Liu,<sup>a</sup> Haishen Yang<sup>b</sup> and Ya Du<sup>\*a</sup>

<sup>a</sup> Institute of Advanced Synthesis, School of Chemistry and Molecular Engineering, Nanjing Tech University, Nanjing 211816 Jiangsu, P. R. China

<sup>b</sup> Shanghai Key Laboratory of Materials Protection and Advanced Materials in Electric Power, College of Environmental and Chemical Engineering, Shanghai University of Electric Power, Shanghai, 200090, China

\*E-mail: ias\_ydu@njtech.edu.cn (Y. D.)

### Table of Contents

|                                                                |    |
|----------------------------------------------------------------|----|
| I. Characterization Methods .....                              | 2  |
| II. Synthetic Precursors .....                                 | 2  |
| III. Synthetic COFs .....                                      | 3  |
| IV. Structural Refinements .....                               | 5  |
| V. BET Plot for N <sub>2</sub> Isotherm .....                  | 8  |
| VI. Solid-State <sup>13</sup> C CP-MAS NMR Spectra .....       | 8  |
| VII. Chemical Stability Tests .....                            | 9  |
| VIII. The Catalytic Activity of the Monomer .....              | 9  |
| IX. Mechanism of Knoevenagel Condensation Reaction .....       | 10 |
| X. SEM Image after Five Cycles .....                           | 11 |
| XI. Study on the Cycling Stability of Catalysts .....          | 12 |
| XII. FT-IR Comparison Chart before and after Five Cycles ..... | 13 |
| XIII. NMR Spectra .....                                        | 14 |
| XIV. References .....                                          | 23 |

## I. Characterization Methods

Chemicals were obtained from Energy Chemical or Aladdin, and used without further purification unless otherwise noted. The solvents were dried and distilled according to conventional procedures.

<sup>1</sup>H spectra was recorded in CDCl<sub>3</sub> or DMSO-d<sub>6</sub> on Bruker Advance or Joel 400 MHz spectrometers. Fourier transform infrared (FT-IR) spectra were obtained with KBr plates by using a IS10 FT-IR Spectrometer (Thermo Fisher Corporation). Powder X-ray diffraction (PXRD) patterns were recorded on a Smart Lab 3Kw (Rigaku Corporation). Nitrogen gas adsorption experiments were performed on a Quanta chrome Autosorb-iQ3 automatic volumetric instrument. The samples were sputtered with Au (nano-sized film) prior to imaging. Thermogravimetric analyses (TGA) were carried out on a STA449 analyzer (Netzsch Corporation) under N<sub>2</sub> atmosphere at a heating rate of 10 °C min<sup>-1</sup> within a temperature range of 30-800 °C. Solid-state <sup>13</sup>C CP/MAS NMR spectra were recorded on a Bruker AvanceIII-400 MHz spectrometer. The particle size distribution was measured by the Laser Particle Size Analyzer Omini. Transmission electron microscope (TEM) samples were examined by using a JEM-ARM200F and JEOL 1400Plus operating at 200 kV. The reaction autoclave used in the experiment was purchased from Beijing Laibei Scientific Instrument Co., Ltd.

## II. Synthetic Precursors

2,7-diamino-10-methylphenoxazine(DAPO),<sup>1</sup> tri(4-formylphenoxy)-cyanurate (TFPC)<sup>2</sup> and 1,3,5-triazine(4-aldehyde benzene)triazine (TFPT)<sup>3</sup> were synthesized according to the reported procedures. Their <sup>1</sup>H NMR spectra match well with those reported previously.

### III. Synthetic COFs

#### Synthesis of DAPO-TFPC-COF.

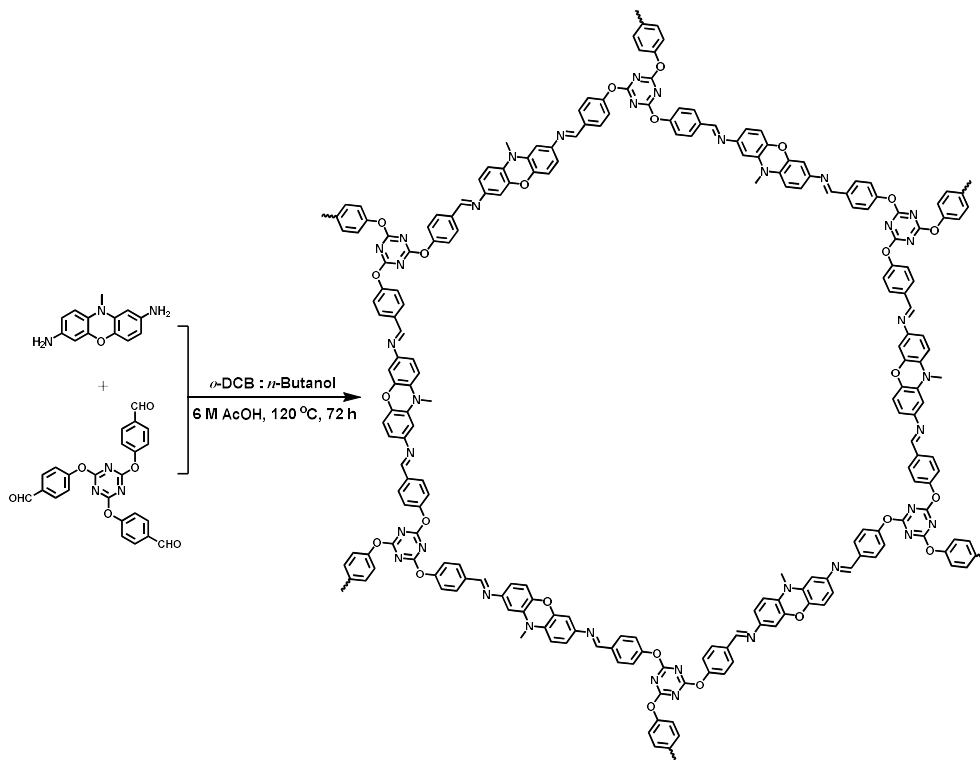

10-methyl-phenoxazine-2,7-diamine (DAPO, 34.1 mg, 0.15 mmol) and tri(4-formylphenoxy)cyanurate (TFPC, 44.1 mg, 0.1 mmol) were mixed in a Schlenk tube filled with nitrogen. Subsequently, *o*-DCB (1 mL) and *n*-Butanol (1 mL) were added, placed in the ultrasonic machine for 15 minutes to blend well; After it, added the catalyst AcOH (0.3 mL, 6 mol/L), froze the mixture in liquid nitrogen, removed vacuum and the reaction system was degassed through three freezing-vacuum-melting cycles. Take the mixture froze and seal the tube with a flamethrower, and put it in oven for 3 days at 120 °C. The solid was filtered then washed with DMF, THF, and acetone. The solid was vacuum-dried at 80 °C for 12 h to afford yellow crystalline powder (69.2 mg, 87%).

## Synthesis of DAPO-TFPT-COF.

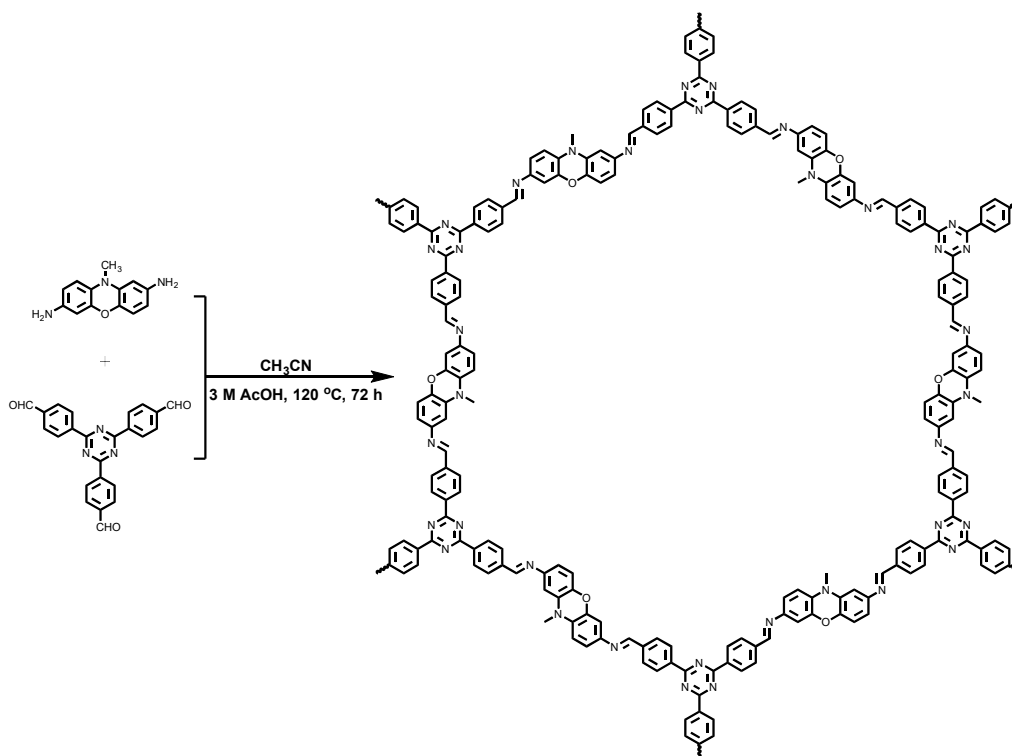

2,7-diamino-10-methylphenoxazine (DAPO, 30.6 mg, 0.135 mmol) and 1,3,5-triazine (4-aldehyde benzene) triazine (TFPT, 35.4 mg, 0.09 mmol) were dissolved in 3 mL of acetonitrile in Schleck tube. Ultrasonic treatment for 15 minutes promoted dispersive dissolution. After it, added the catalyst AcOH (0.9 mL, 3 mol/L), froze the mixture in liquid nitrogen, removed vacuum and the reaction system was degassed through three freezing-vacuum-melting cycles. The reaction mixture is sealed and heated at 120 °C for 3 days. Take the mixture froze and seal the tube with a flamethrower, and put it in oven for 3 days at 120 °C. The solid was filtered then washed with DMF, THF, and acetone. The solid was vacuum-dried at 80 °C for 12 h to afford red crystalline powder (56 mg, 89%).

## IV. Structural Refinements

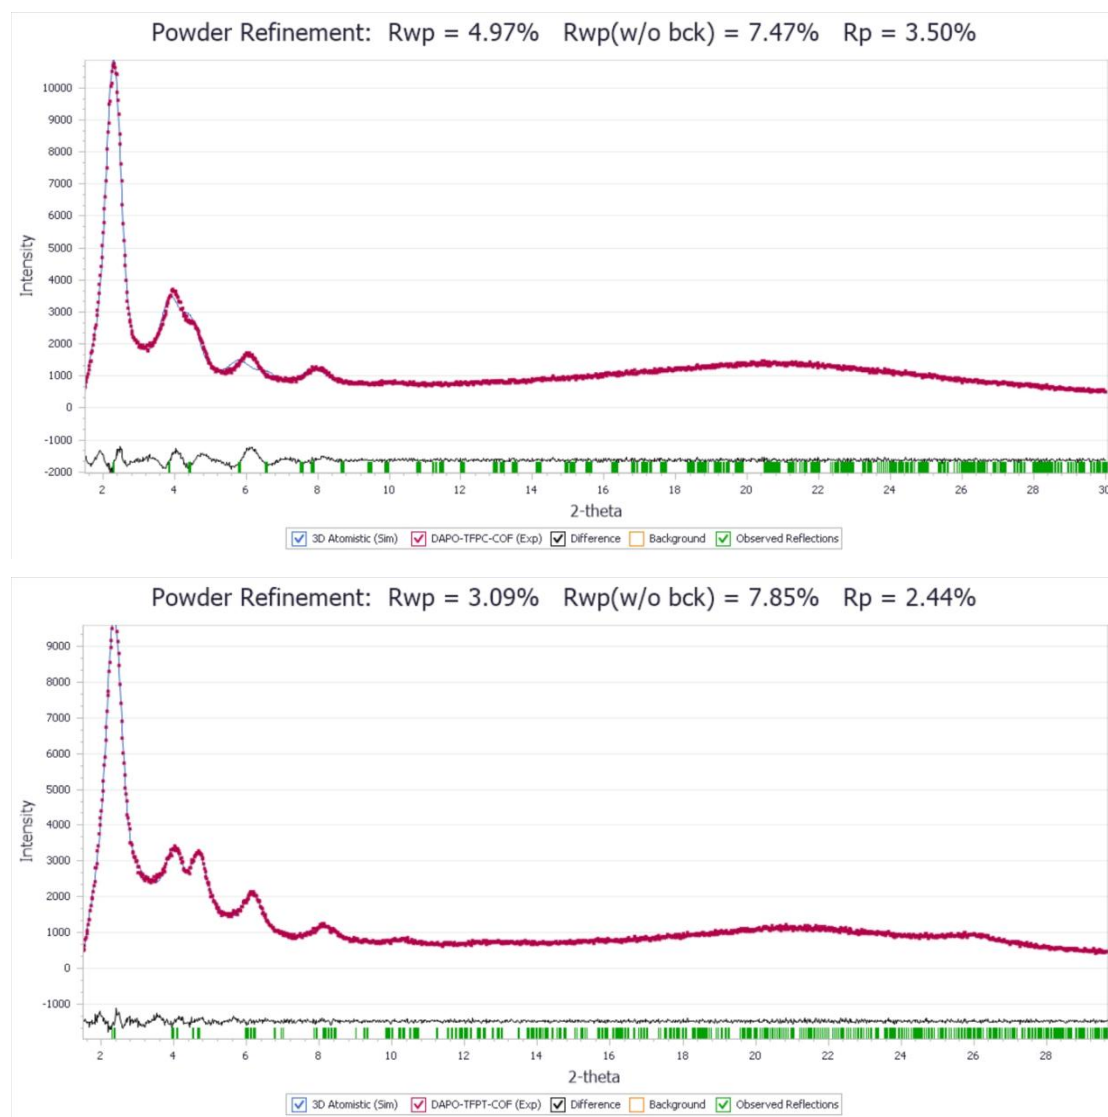

**Figure S1.** DAPO-TFPC-COF and DAPO-TFPT-COF experimental powder PXRD and Pawley refinement (upper), Rietveld refinement (lower).

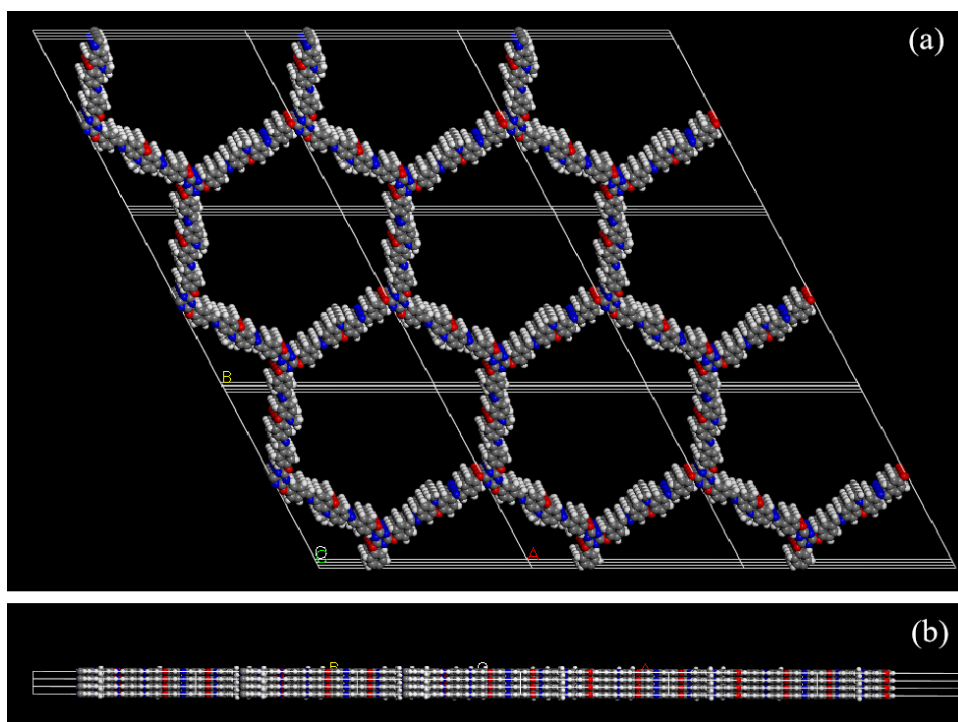

**Figure S2.** The computationally determined structures of DAPO-TFPC-COF. (a) Top and (b) side view of the theoretical structure of DAPO-TFPC-COF with eclipsed (AA) stacking arrangement.

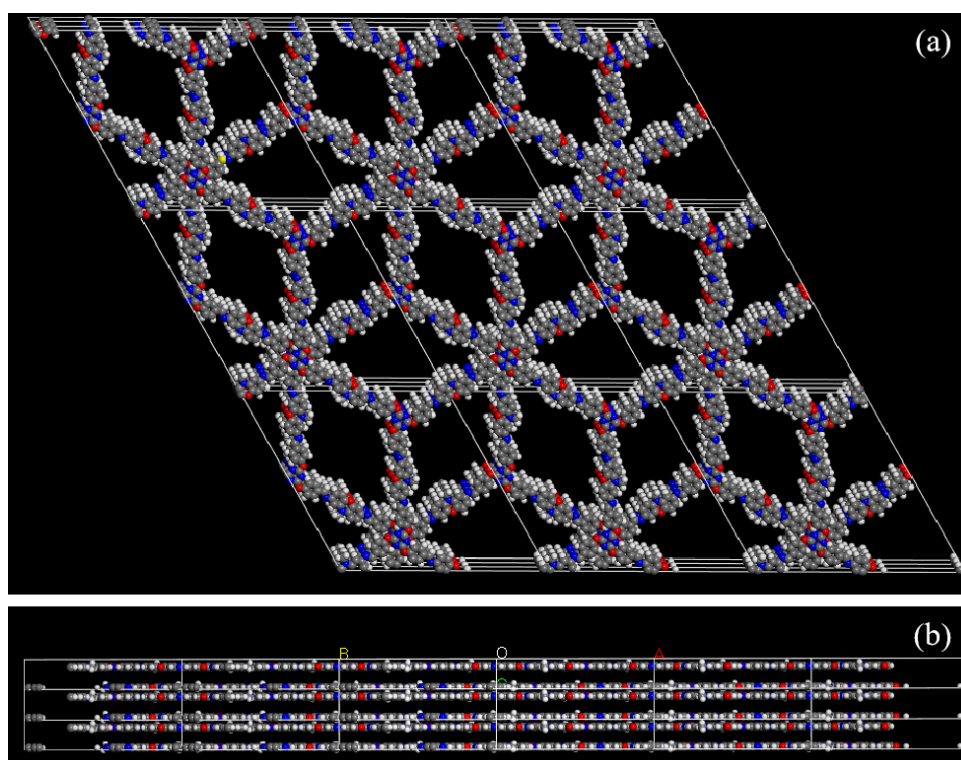

**Figure S3.** The computationally determined structures of DAPO-TFPC-COF. (a) Top and (b) side view of the theoretical structure of DAPO-TFPC-COF with eclipsed (AB) stacking arrangement.

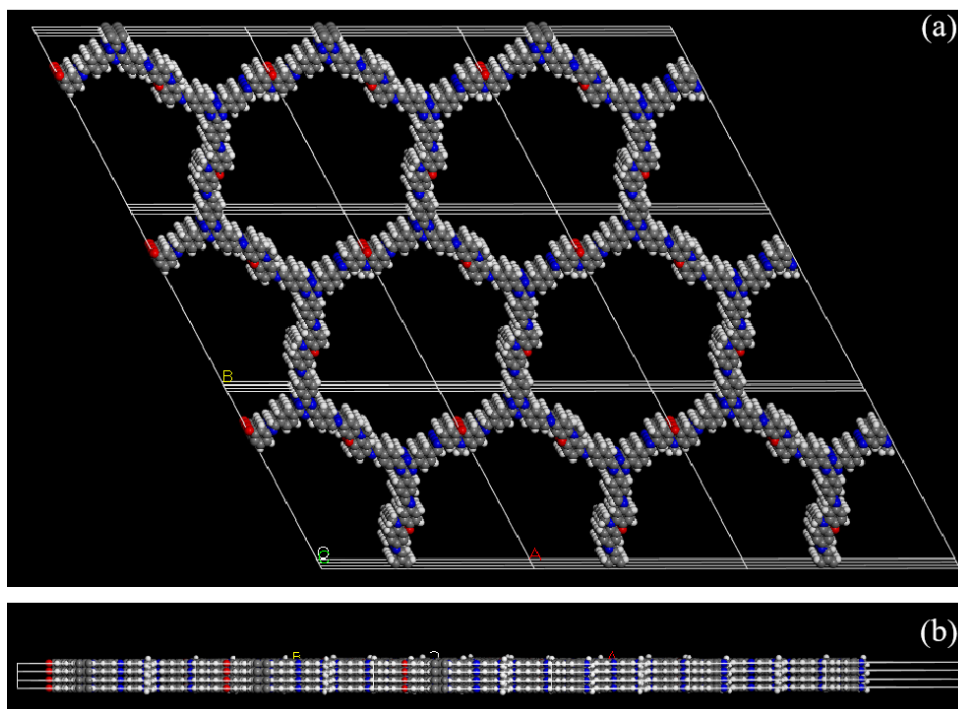

**Figure S4.** The computationally determined structures of DAPO-TFPT-COF. (a) Top and (b) side view of the theoretical structure of DAPO-TFPT-COF with eclipsed (AA) stacking arrangement.

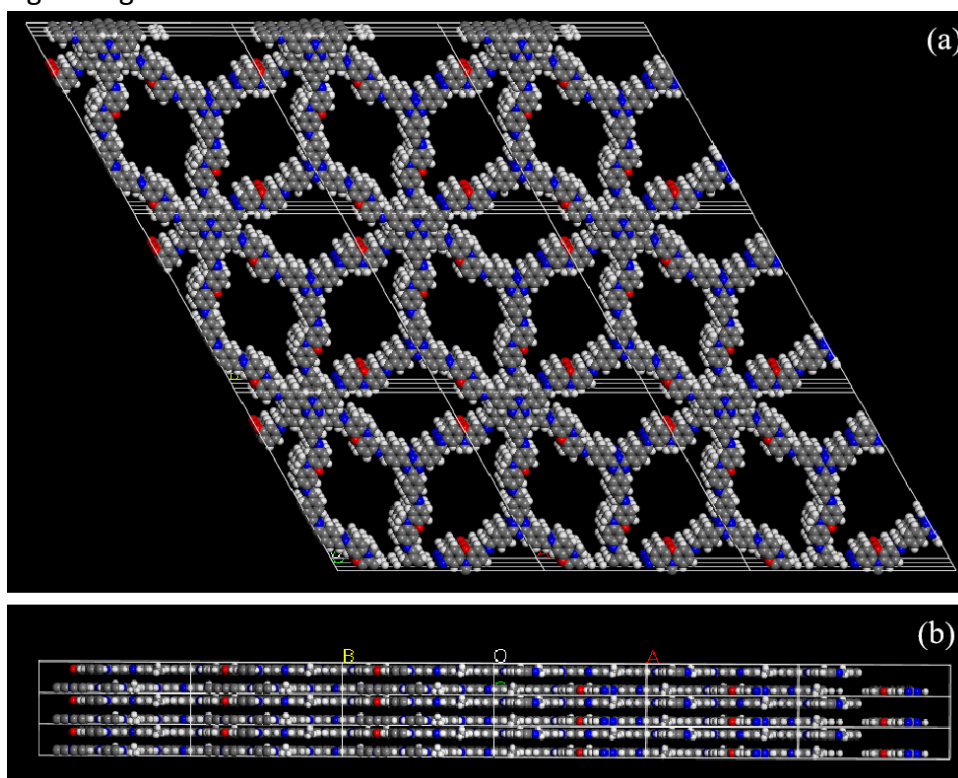

**Figure S5.** The computationally determined structures of DAPO-TFPT-COF. (a) Top and (b) side view of the theoretical structure of DAPO-TFPT-COF with eclipsed (AB) stacking arrangement.

## V. BET Plot for N<sub>2</sub> Isotherm

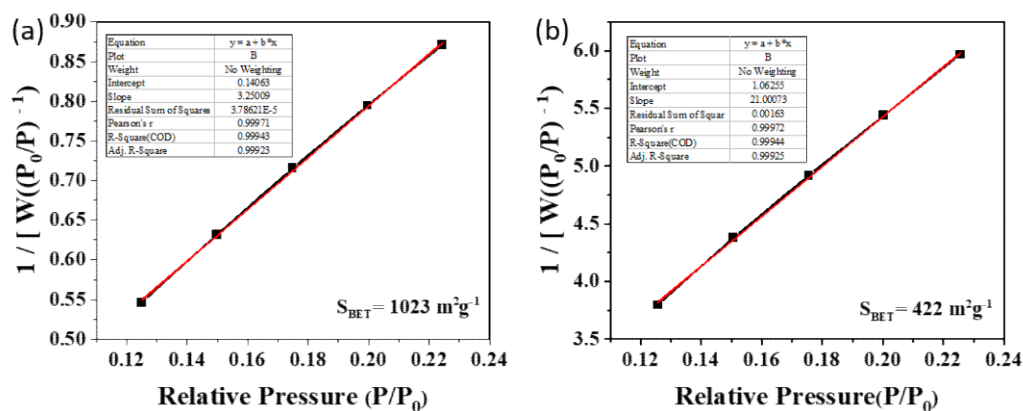

Figure S6 BET plot for (a)DAPO-TFPC-COF; (b)DAPO-TFPT-COF.

## VI. Solid-State <sup>13</sup>C CP-MAS NMR Spectra

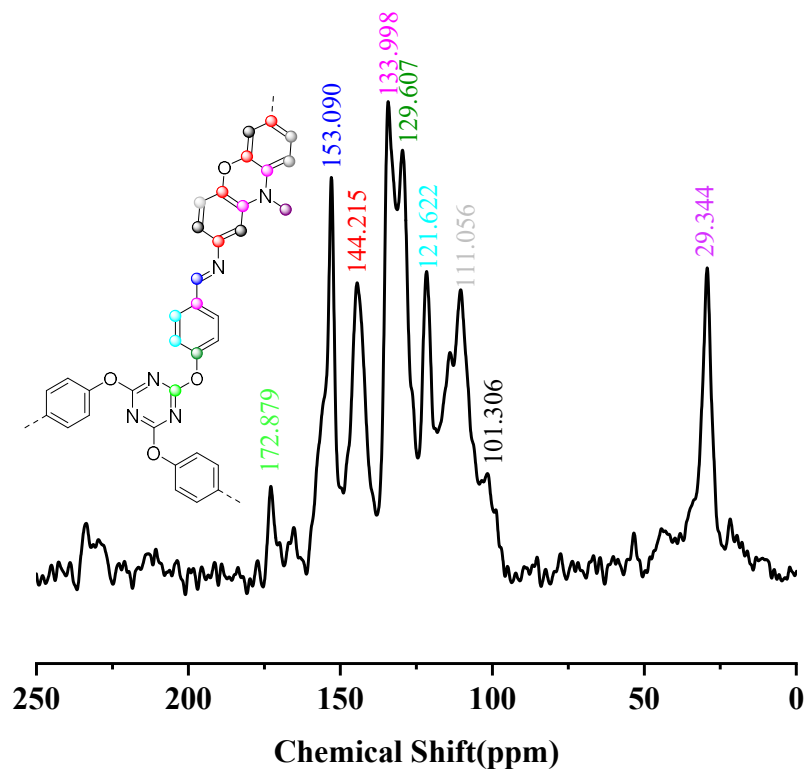

Figure S7. Solid-state <sup>13</sup>C CP-MAS NMR spectra of DAPO-TFPC-COF.<sup>4</sup>



## VII. Chemical Stability Tests

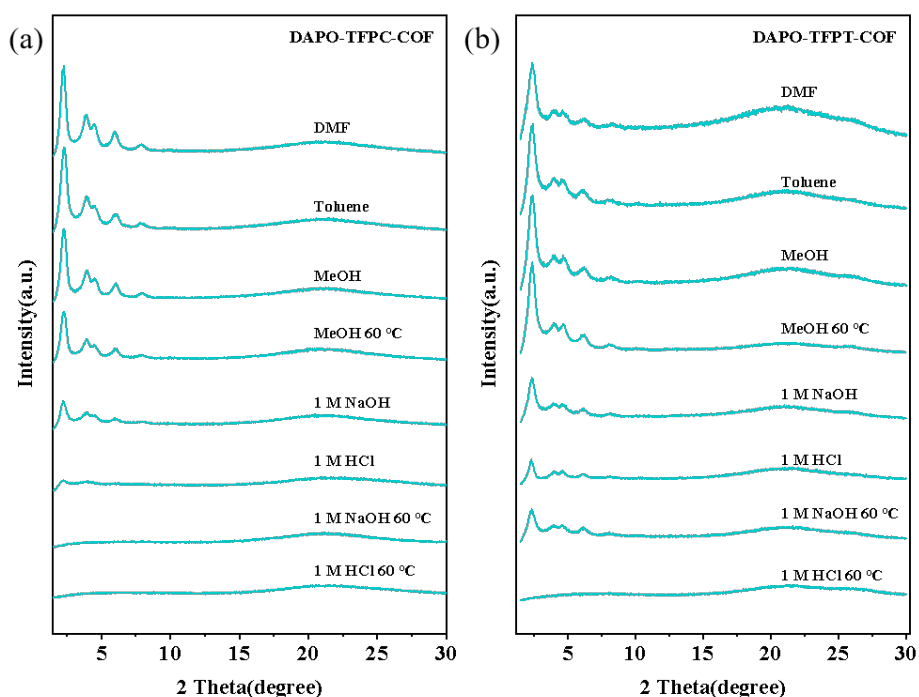

**Figure S8.** Chemical stability tests of the DAPO-TFPC-COF (a) and DAPO-TFPT-COF (b). The DAPO-TFPC-COF and DAPO-TFPT-COF samples were each exposed to identical conditions for 24 h.

## VIII. The Catalytic Activity of the Monomer

**Table S1** The catalytic activities of the three monomers for the Knoevenagel Condensation<sup>a</sup>.

| Catalyst | Am.(mg) <sup>b</sup> | Yield% |
|----------|----------------------|--------|
| TFPC     | 3.6                  | < 1    |
| TFPT     | 3.4                  | < 1    |
| DAPO     | 1.9                  | 81     |

<sup>a</sup> Reaction conditions: Catalyst, benzaldehyde (0.50 mmol), malononitrile (0.60 mmol), Yield (%) was determined using the normalization method with <sup>1</sup>H NMR spectroscopy. <sup>b</sup> The mass of each monomer catalyst was determined based on the proportion of each monomer in the corresponding 5.5 mg COF.

## IX. Mechanism of Knoevenagel Condensation Reaction

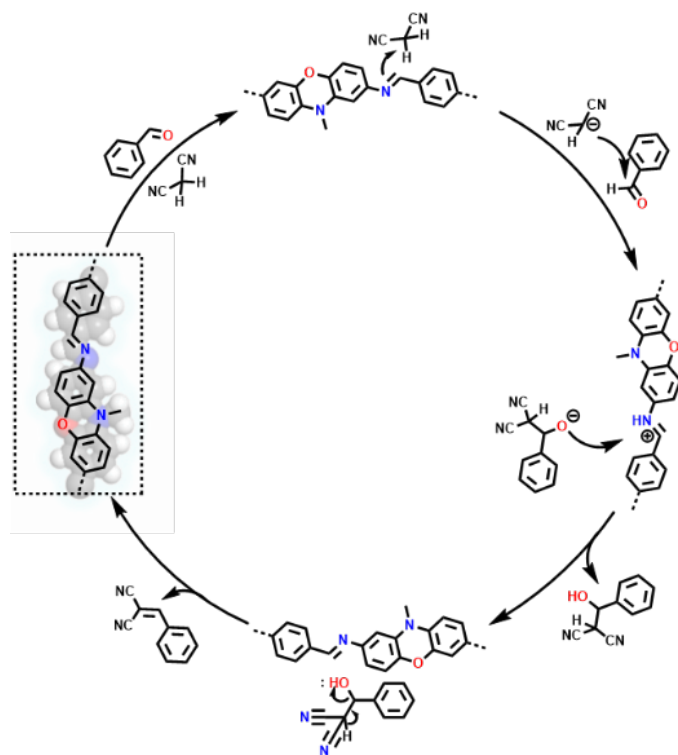

**Figure S9.** Mechanism of the catalytic Knoevenagel condensation reaction.

## X. SEM Image after Five Cycles

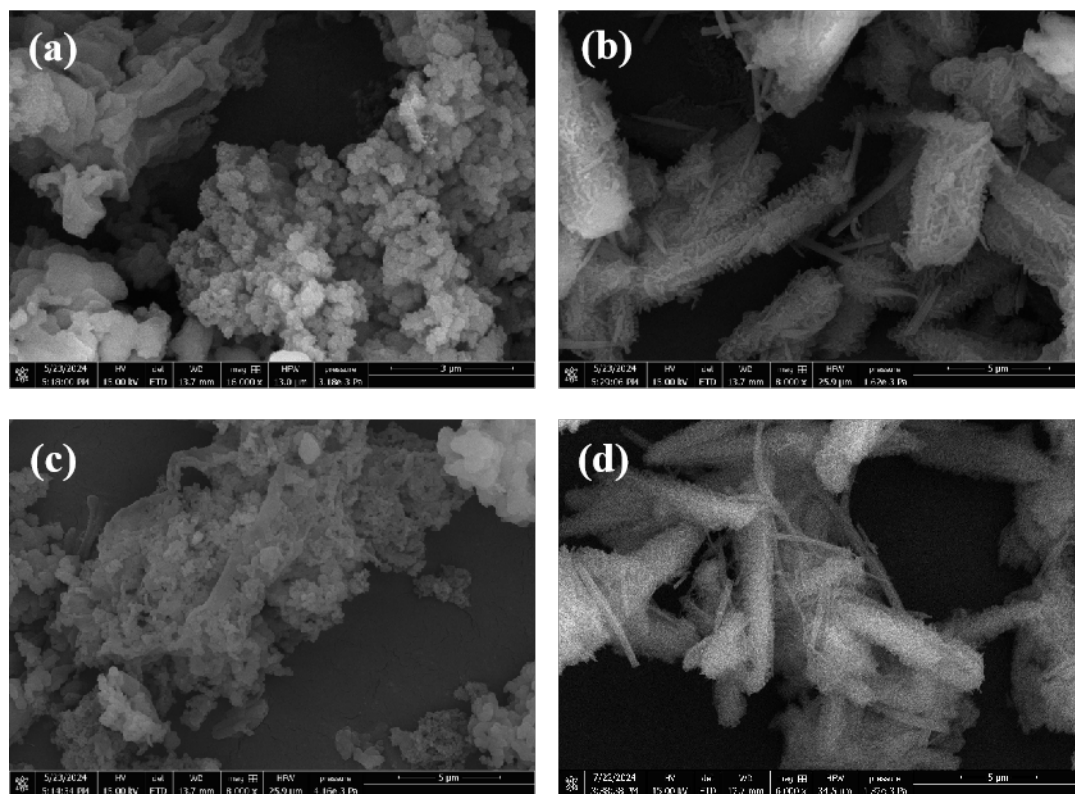

**Figure S10.** SEM image after five cycles of DAPO-TFPC-COF (a) (c) and DAPO-TFPT-COF (b) (d).

## XI. Study on the Cycling Stability of Catalysts

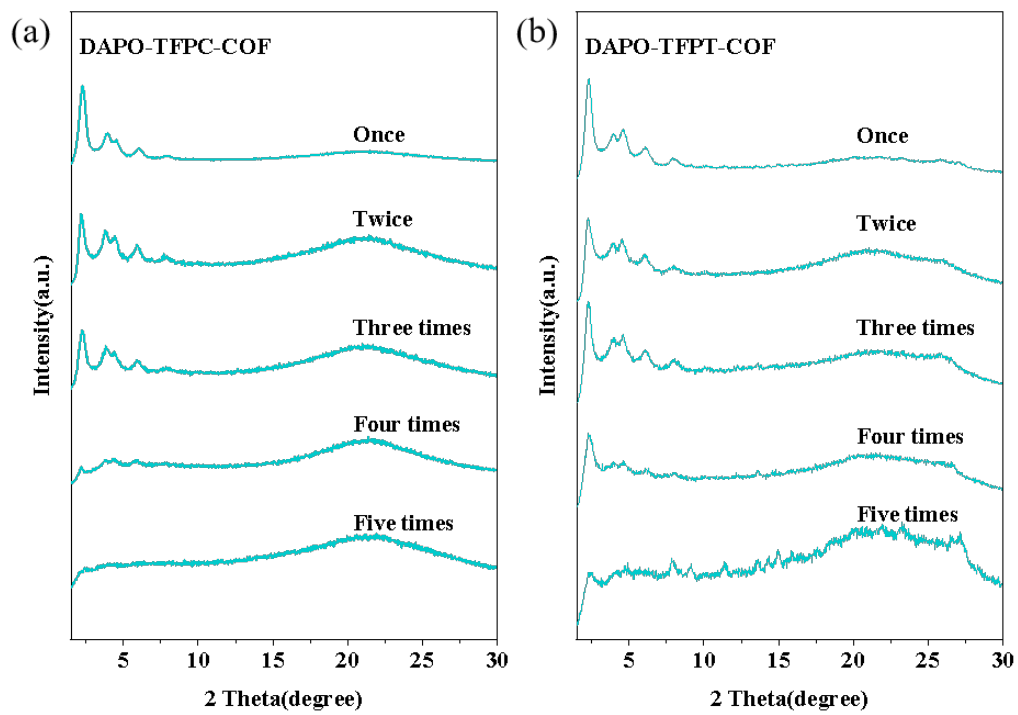

**Figure S11.** (a) PXRD of DAPO-TFPC-COF cycling five times; (b) PXRD of DAPO-TFPT-COF cycling five times.

## XII. FT-IR Comparison Chart before and after Five Cycles

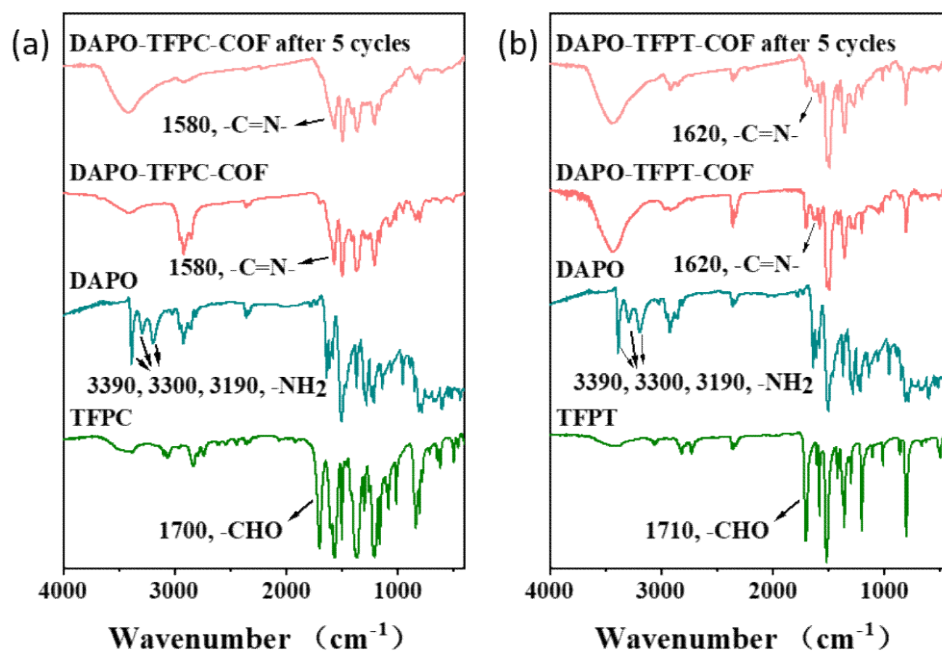

**Figure S12.** The FT-IR comparison chart before and after 5 cycles of DAPO-TFPC-COF (a) and DAPO-TFPT-COF (b).

### XIII. NMR Spectra

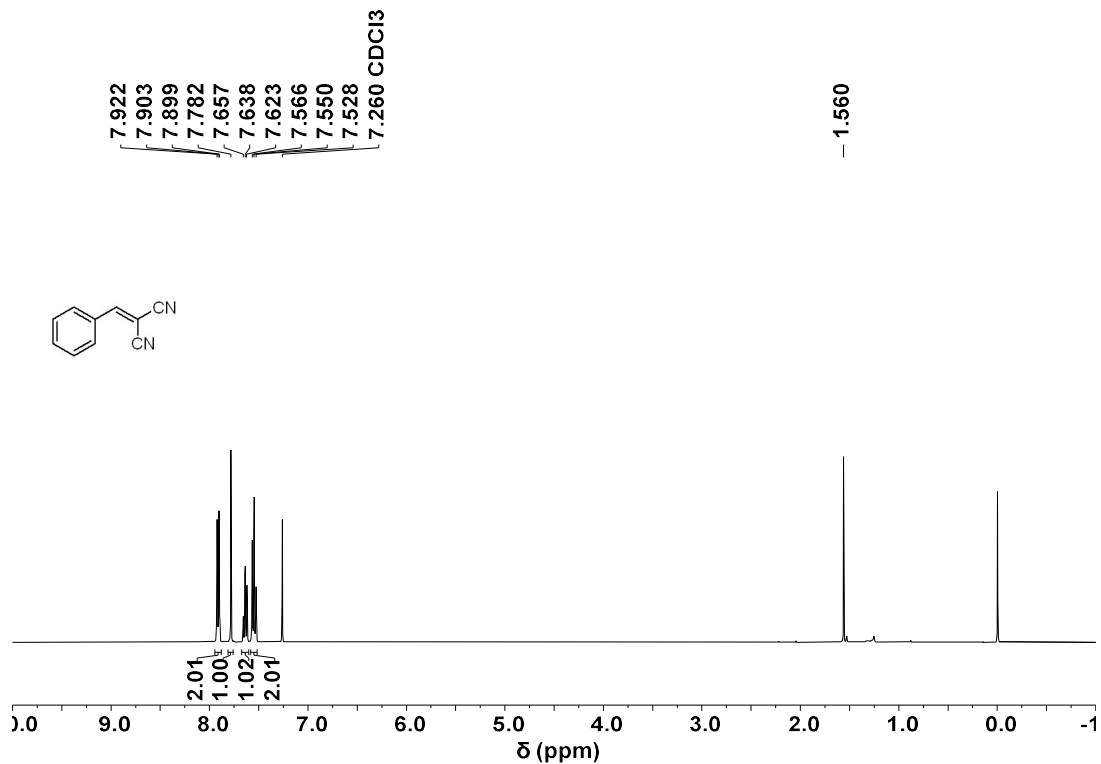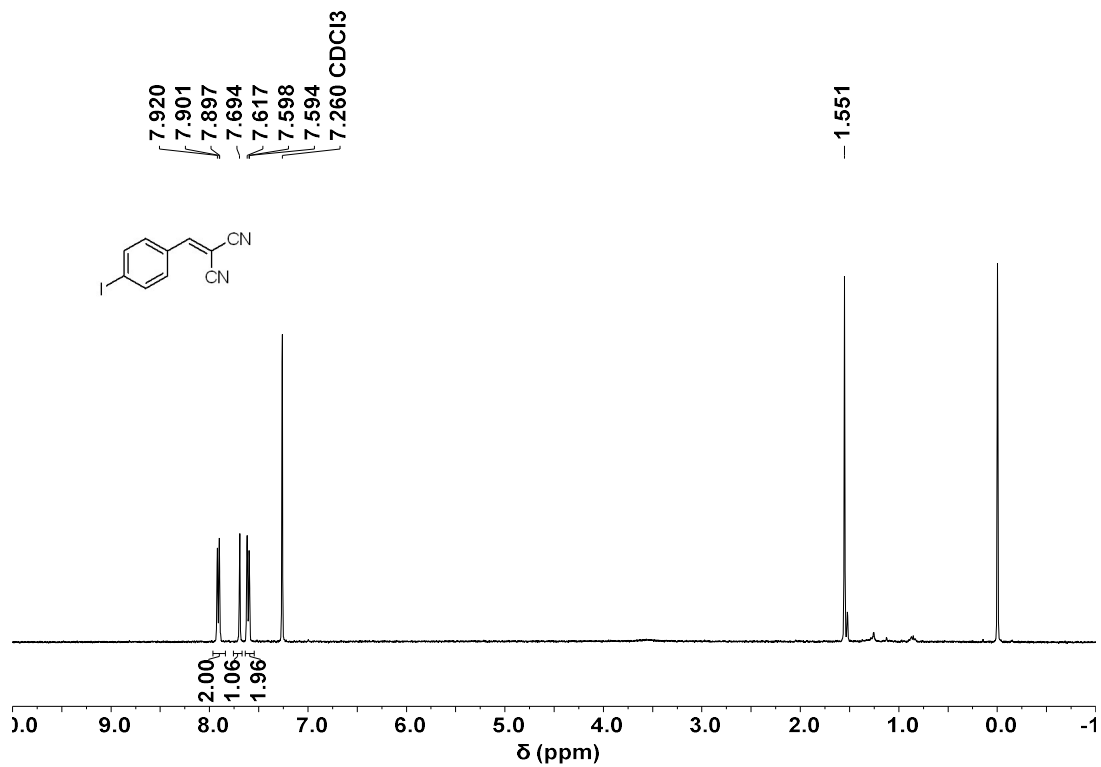

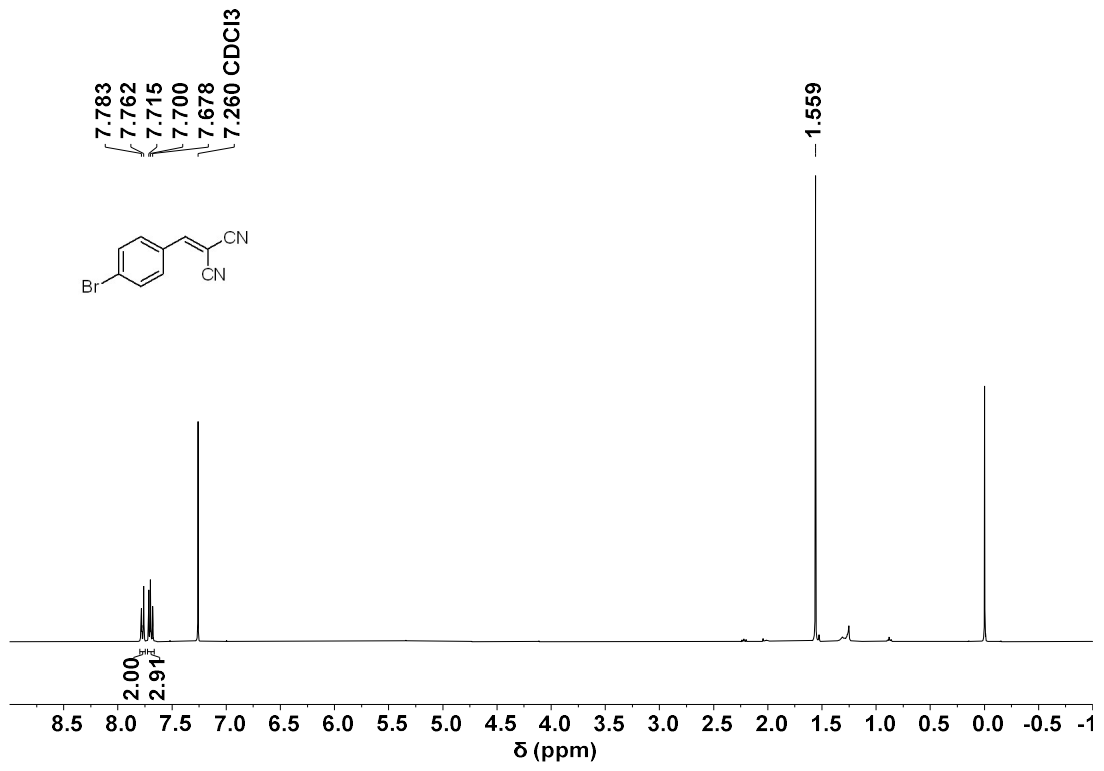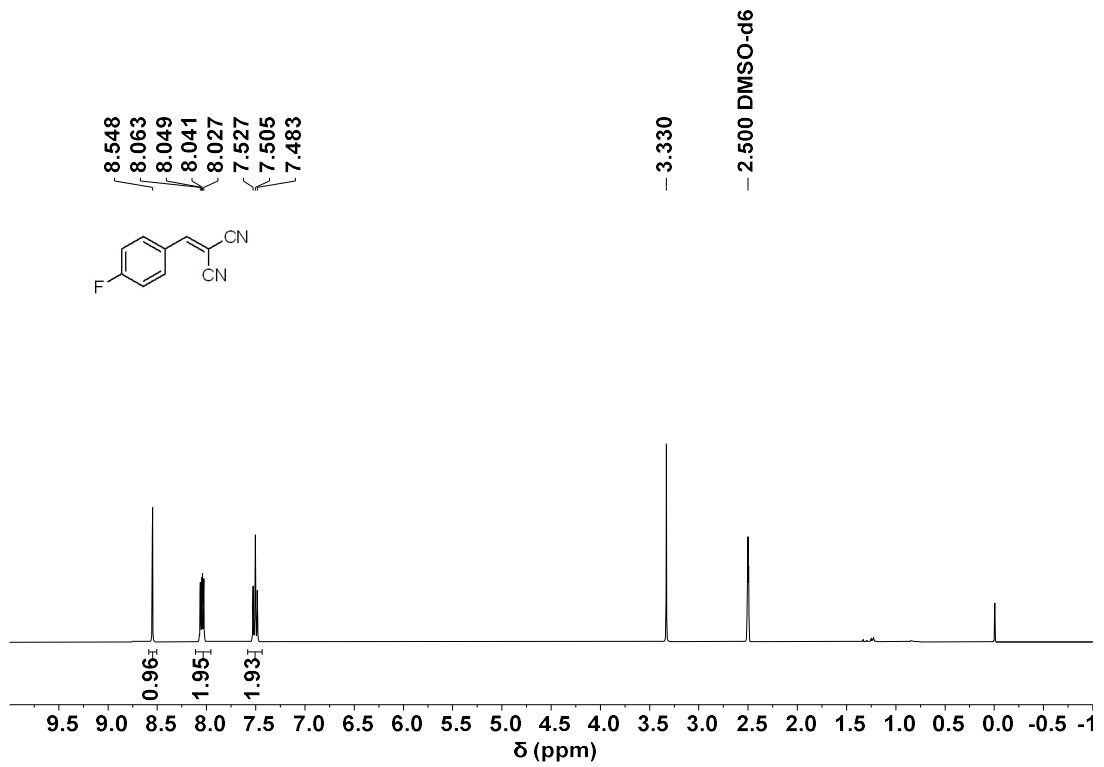

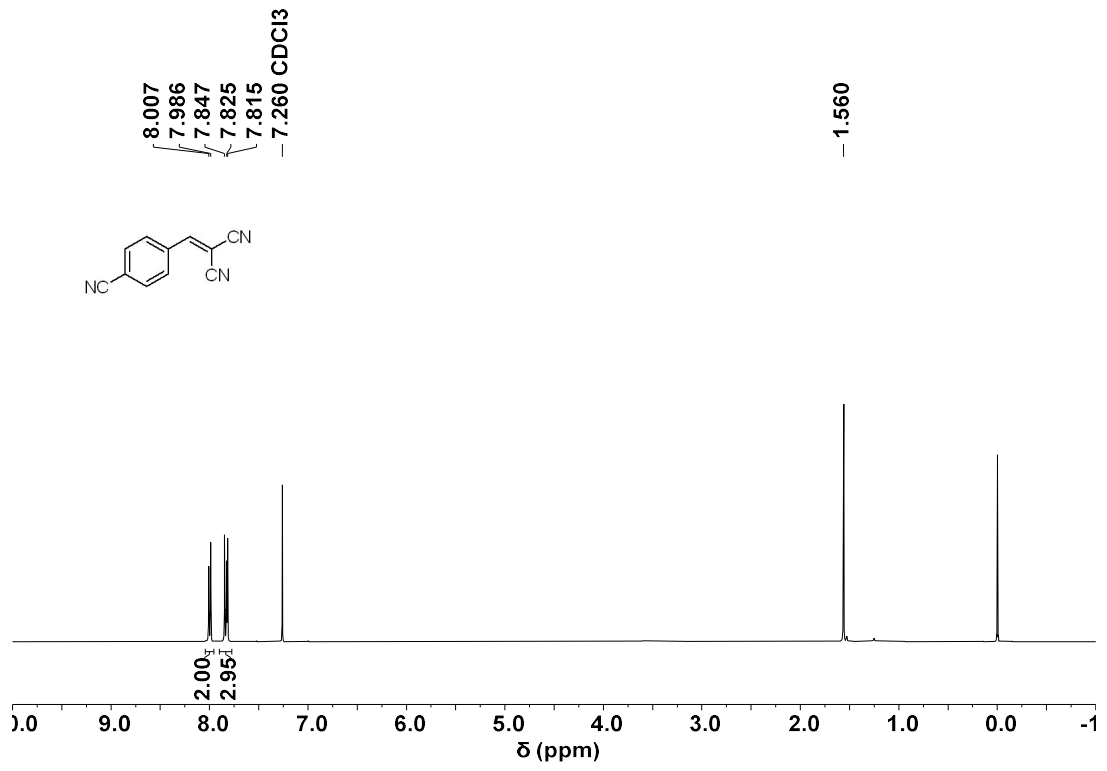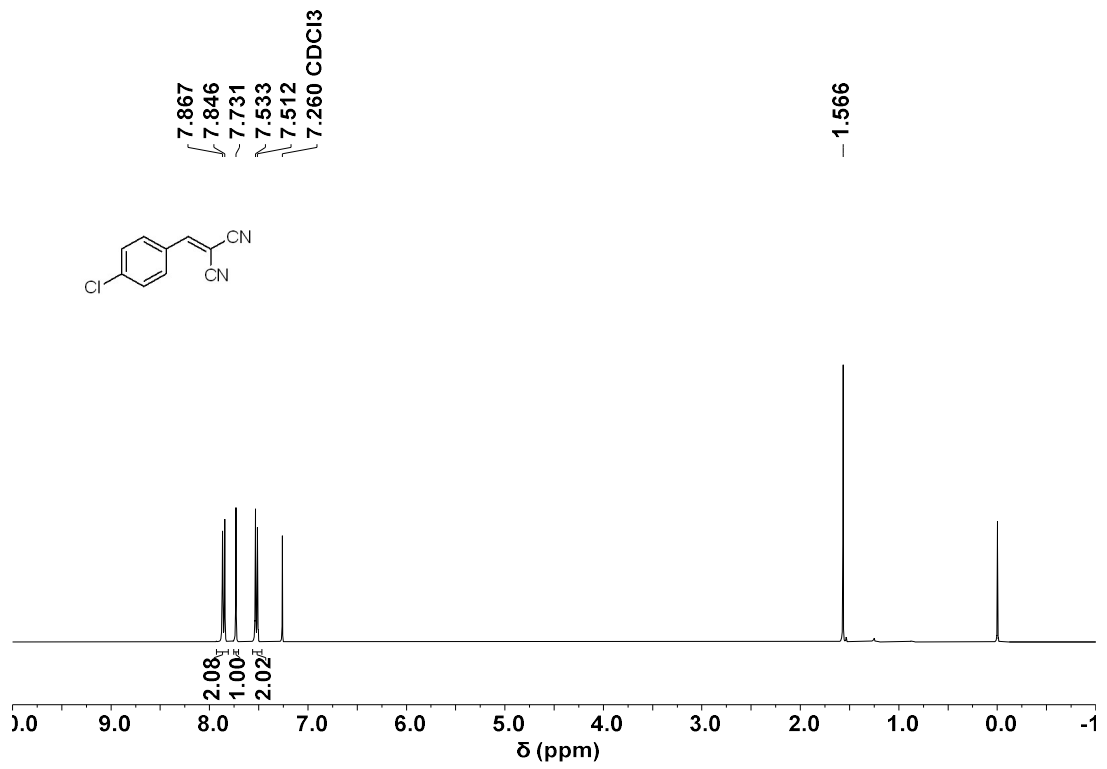



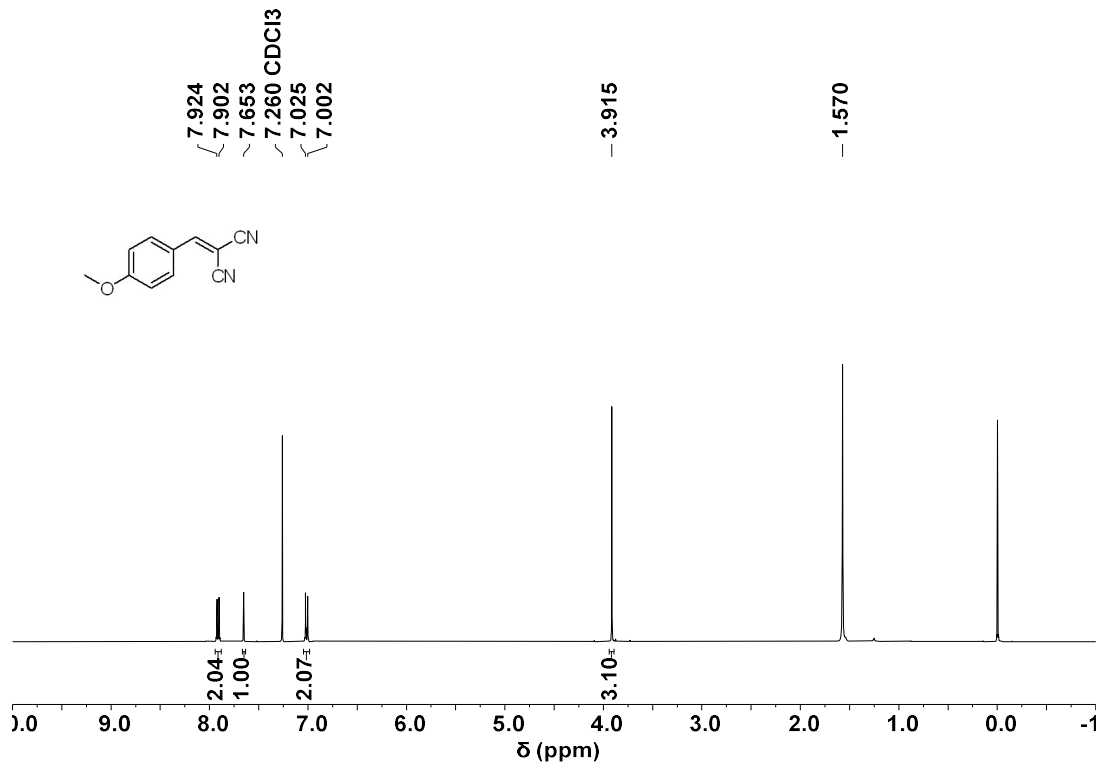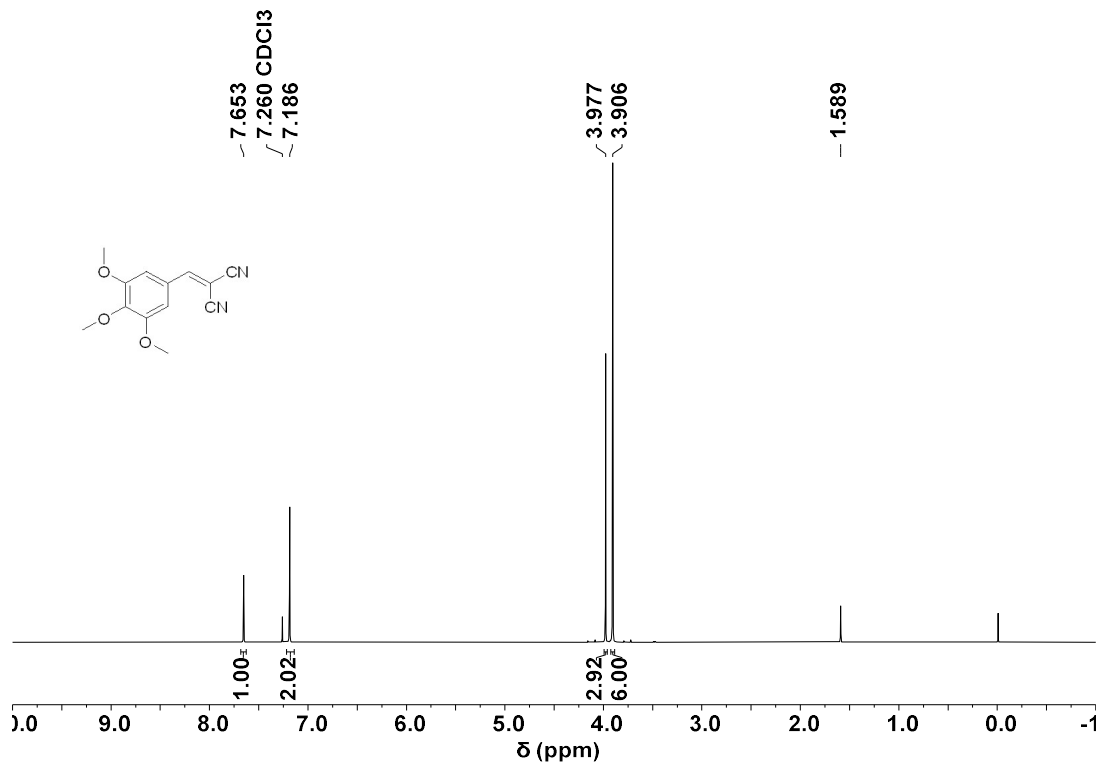

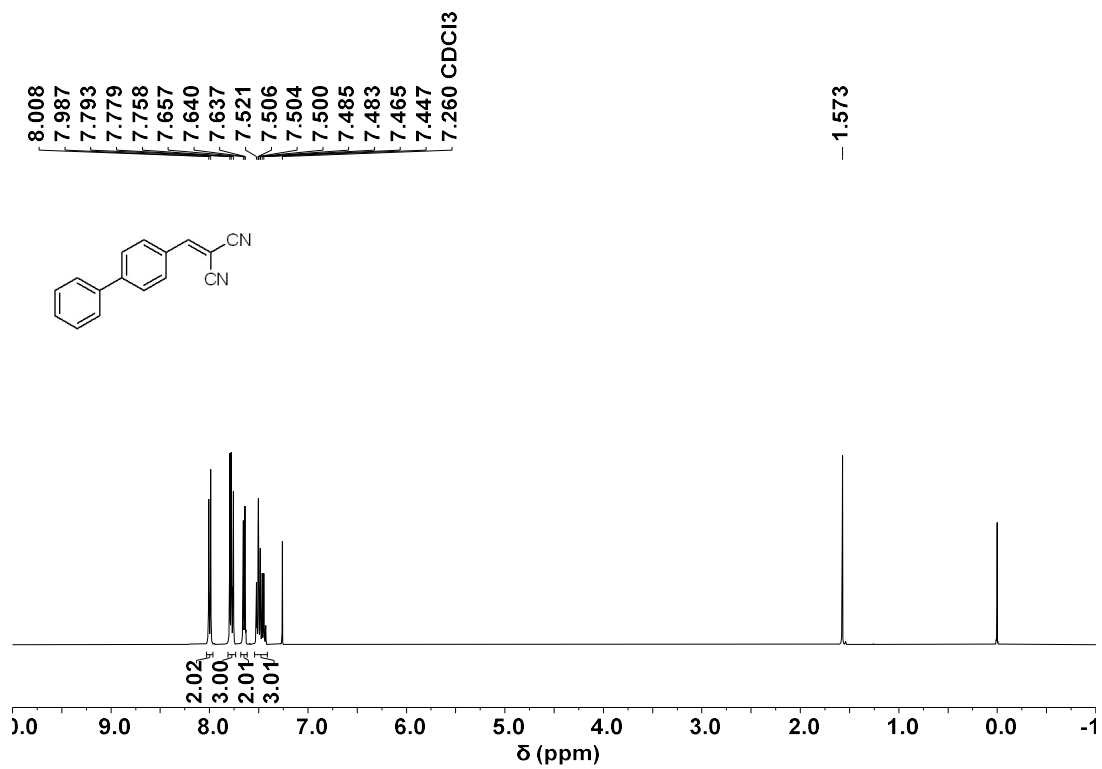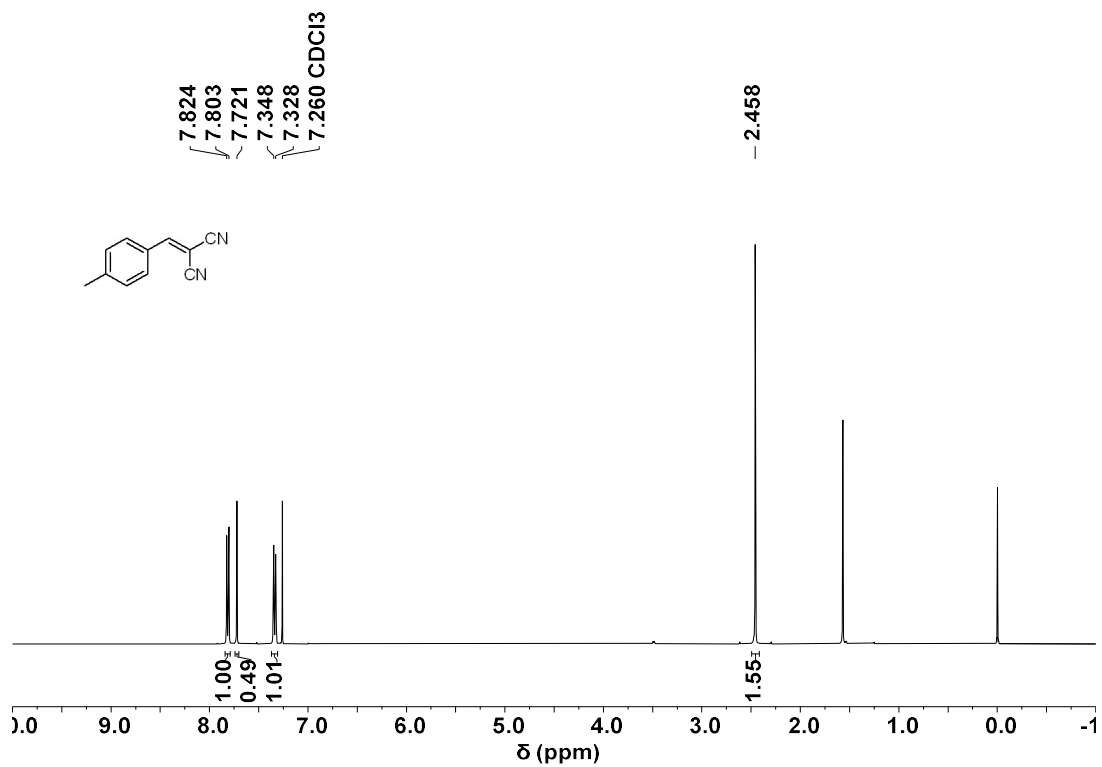

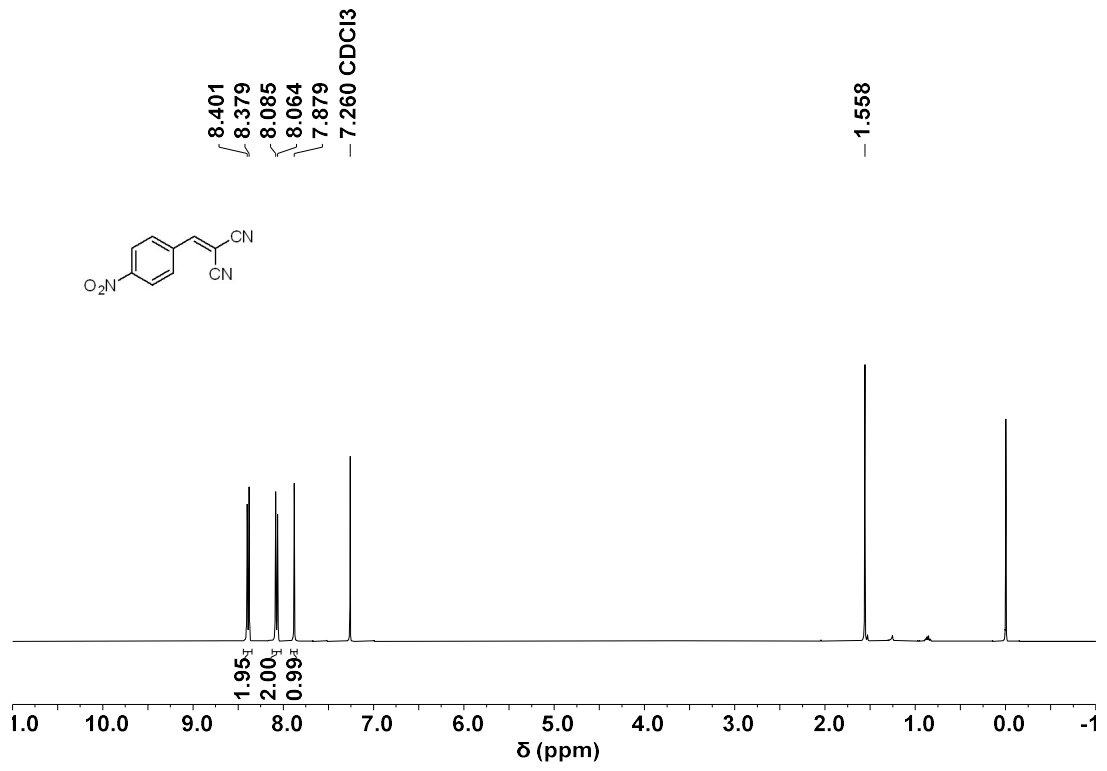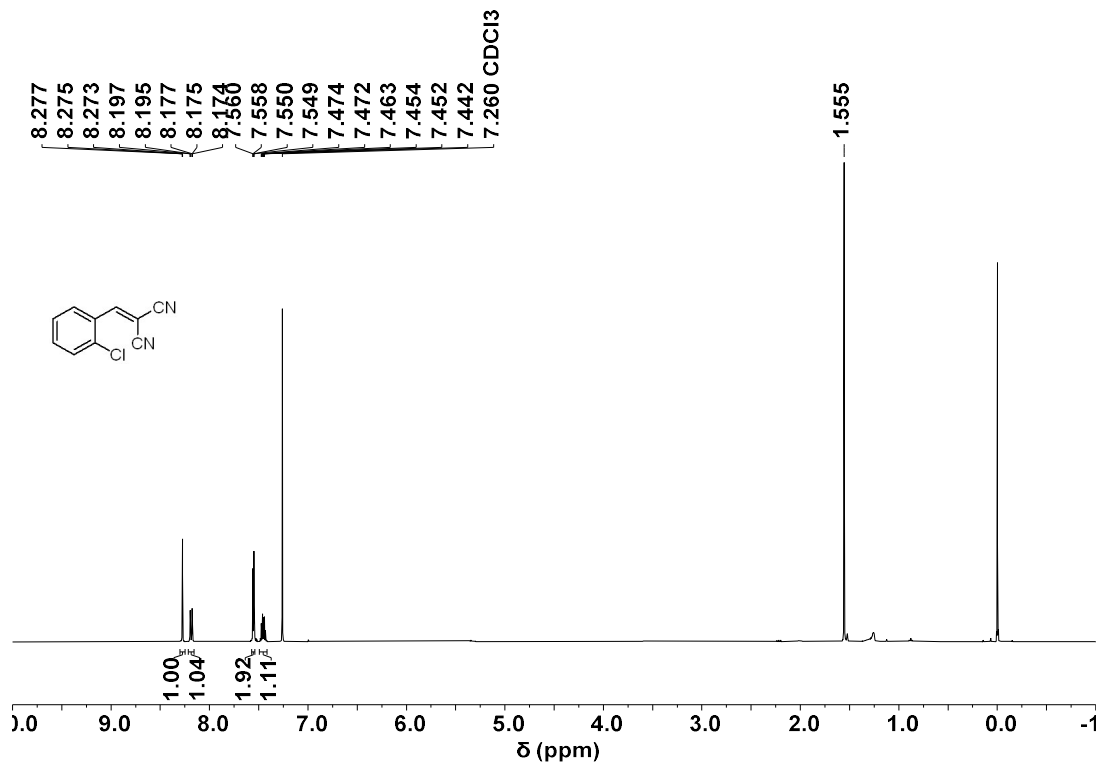

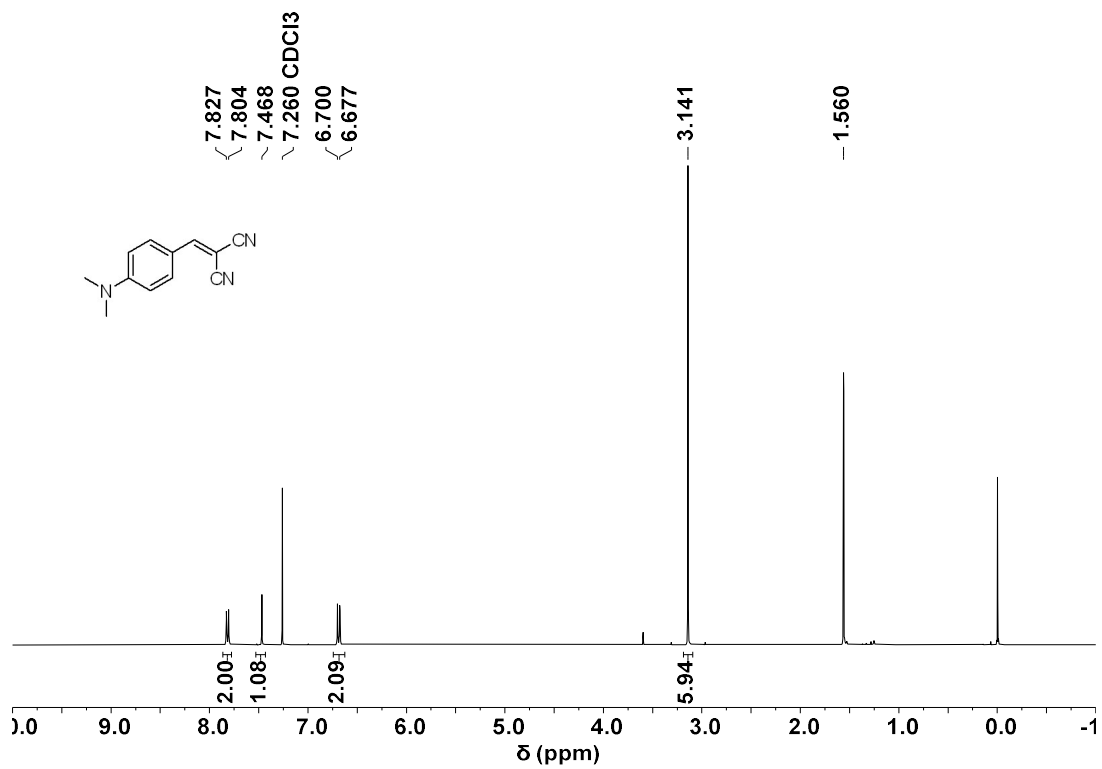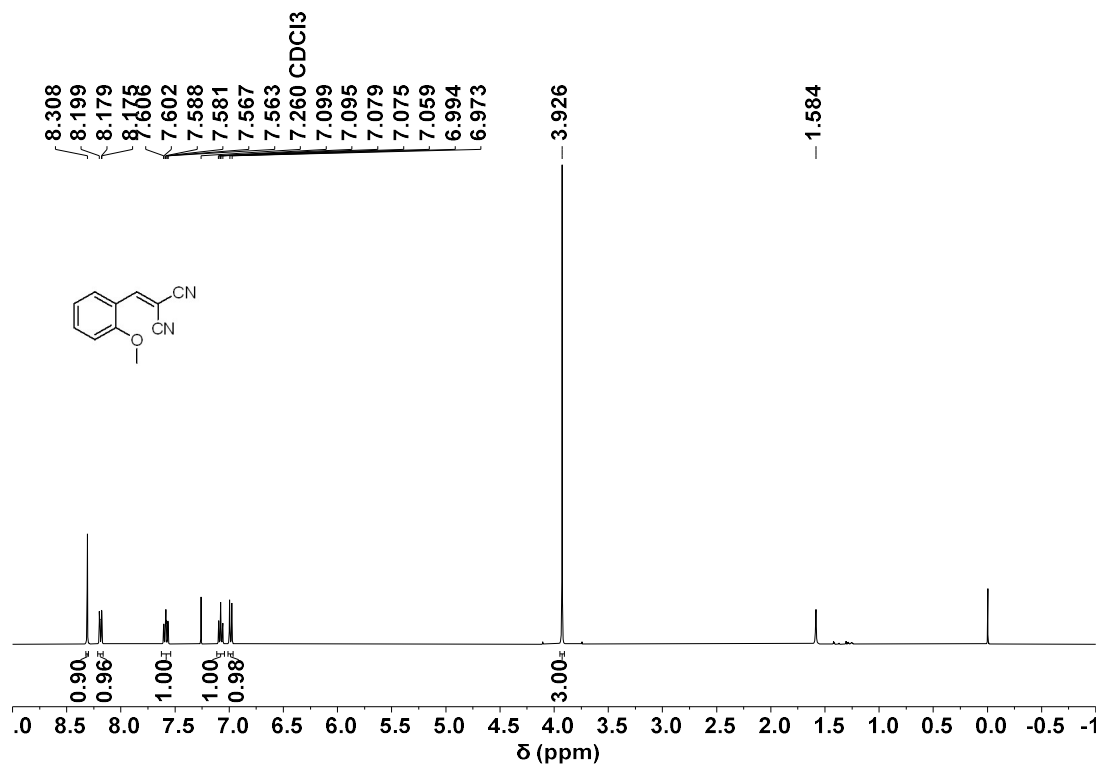

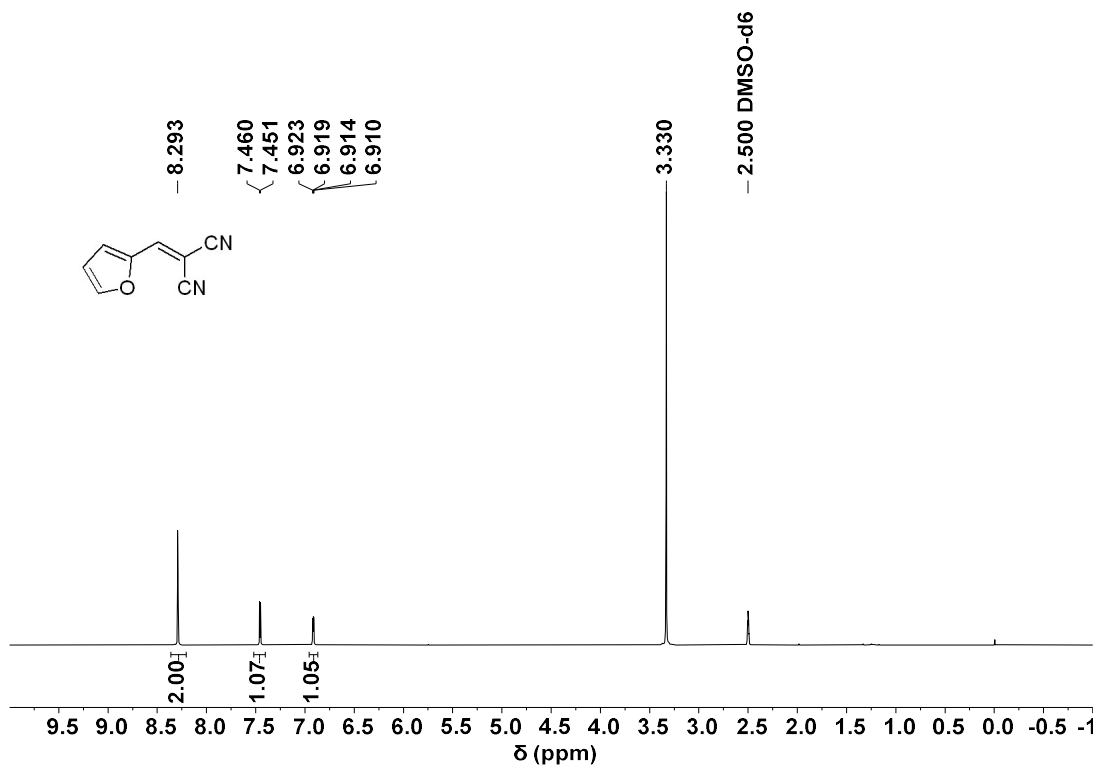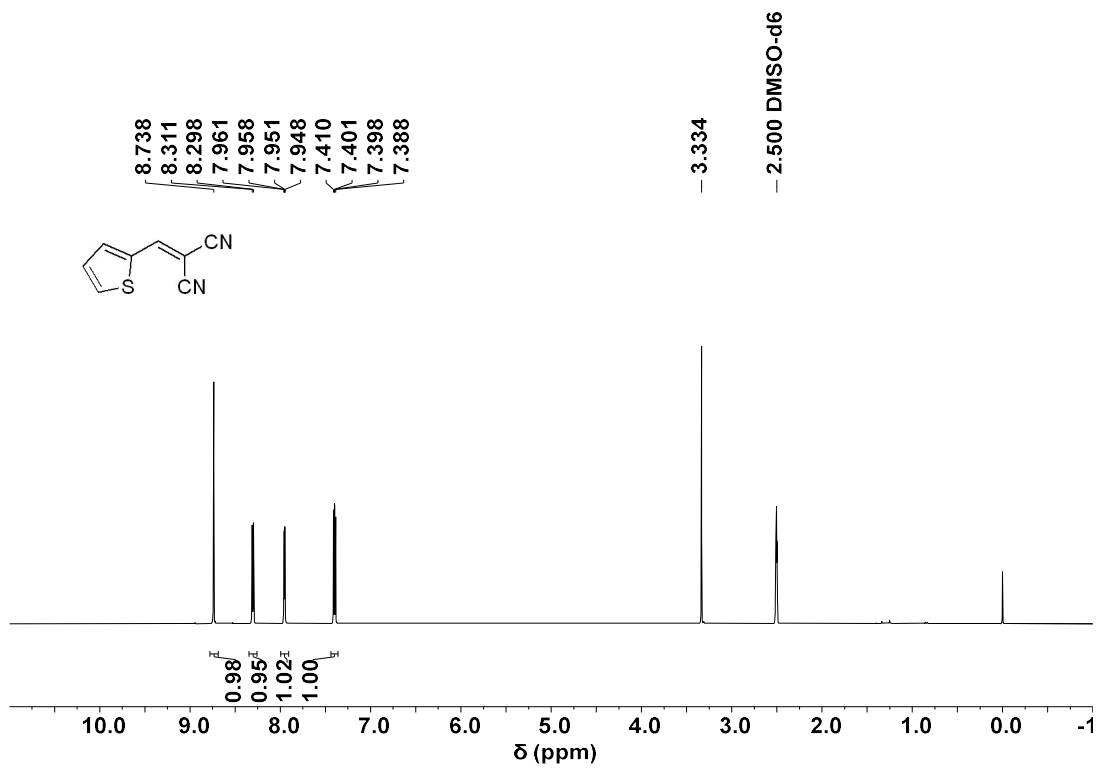

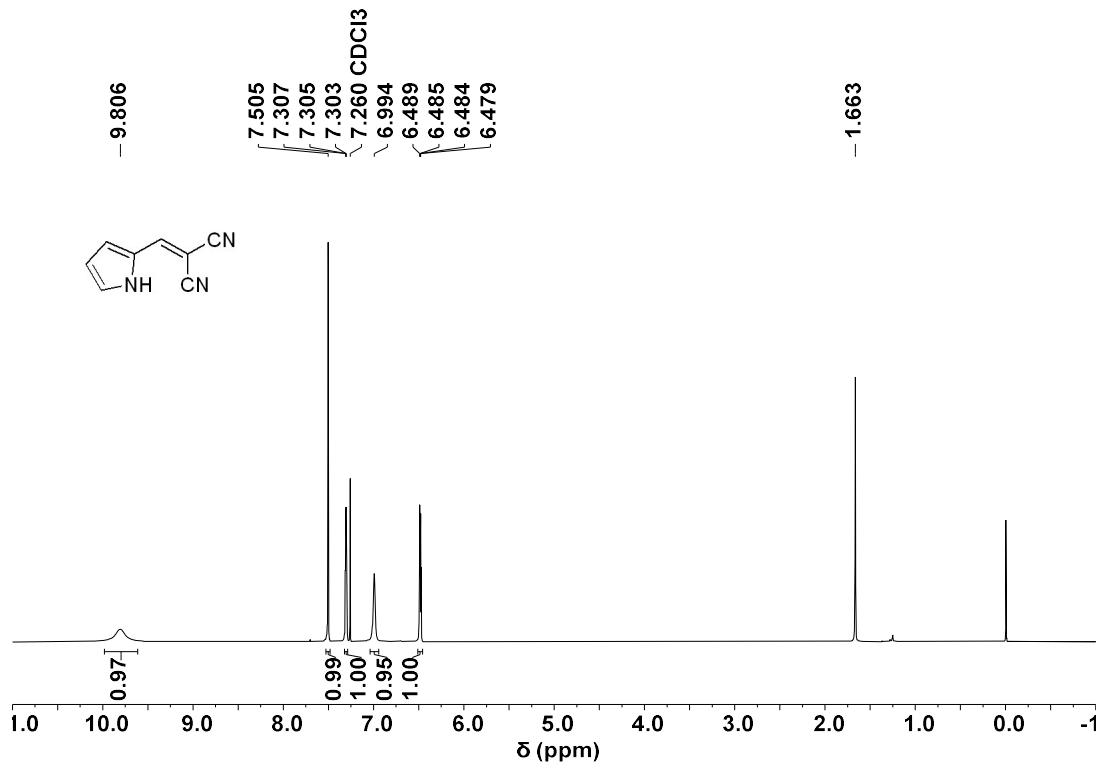

## XIV. References

1. Z. Meng, Y. Zhang, M. Dong, Y. Zhang, F. Cui, T.-P. Loh, Y. Jin, W. Zhang, H. Yang, Y. Du, *J. Mater. Chem. A*, 2021, **9** (17), 10661-10665.
2. P. Das, S. K. Mandal, *ACS Appl. Mater. Interfaces*, 2021, **13** (12), 14160-14168.
3. J. Yang, X. Zhang, W. Si, Y. Cao, J. Qian, Y. Li, B. Li, W. Qin, *ACS Catal.*, 2024, **14** (3), 2022-2030.
4. L. Liu, C. Yin, Y. Li, H. Yang, Y. Du, Y. Wang, *Ind. Eng. Chem. Res.*, 2023, **62** (49), 21304-21310.
